# Supplementary material for: 250 years of daily weather: Temperature and precipitation fields for Switzerland since 1763
Source: Copernicus journal article supplement (doi:10.5194/egusphere-2022-1140), 2022-11-03

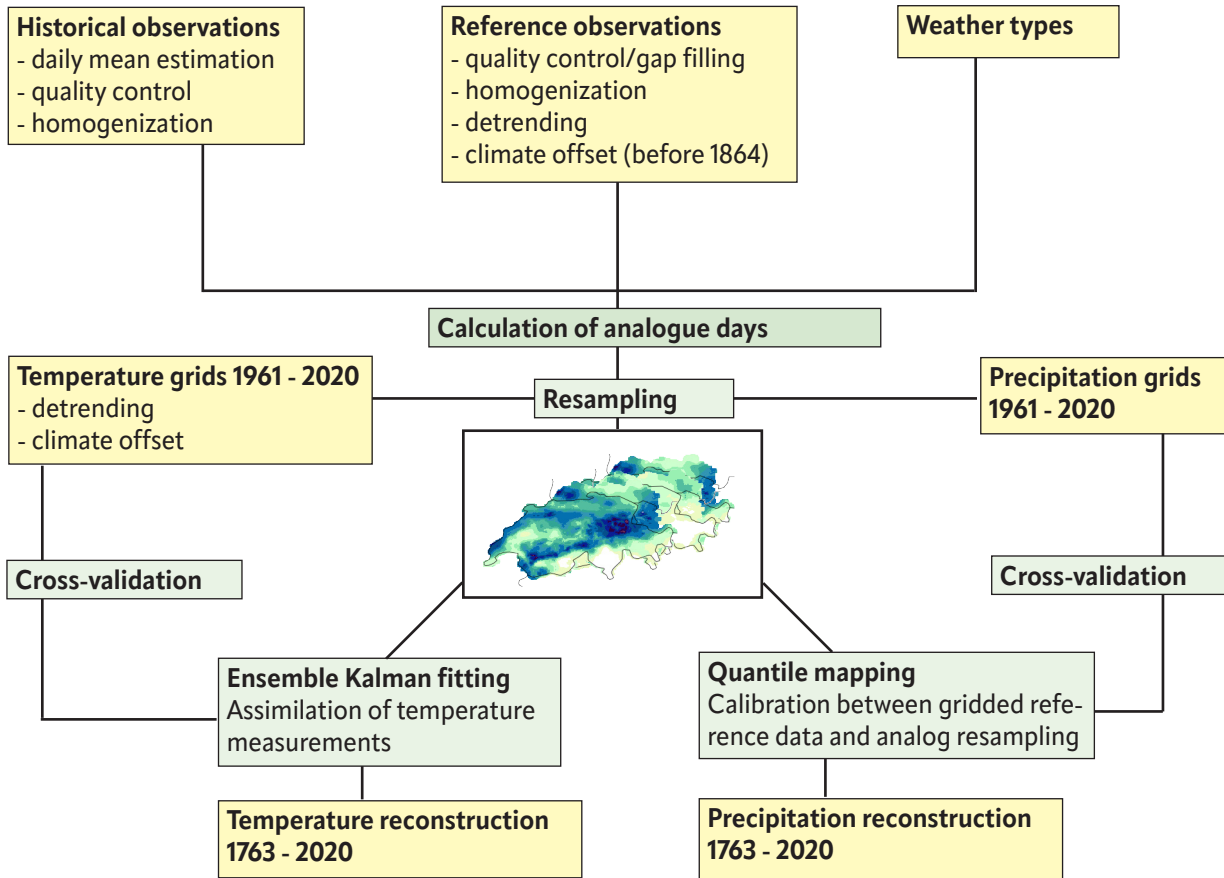

Supplement: Supplementary file [file egusphere-2022-1140-AC2-supplement.pdf]
